# Supplementary material for: Dual-functional hetero-structured TiO2 nanotrees composed of rutile trunks and anatase branches for improved performance of quantum dot-sensitized solar cells
Source: Royal Society of Chemistry journal article supplement (doi:10.1039/c3cp53157k), 2013-01-01
Supplement: c3cp53157k.pdf [file c3cp53157k.pdf]

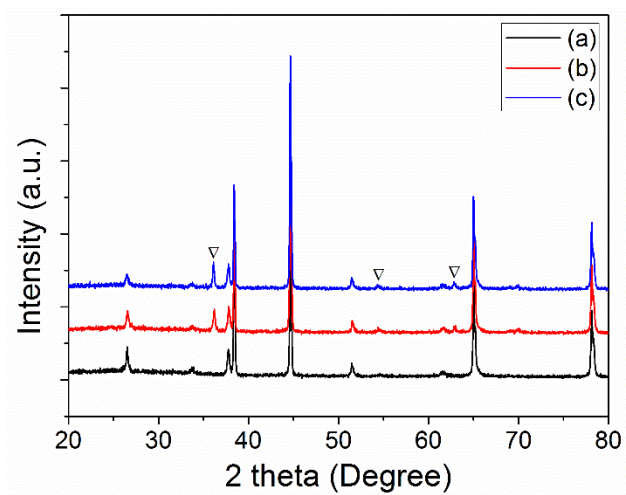

Fig. S1 XRD patterns of (a) FTO glass, (b) rutile NR array on FTO glass, (c) HNT array on FTO glass. ( $\nabla$  the rutile peaks)
